# Supplementary material for: Hemoglobinopathies, merozoite surface protein-2 gene polymorphisms, and acquisition of Epstein Barr virus among infants in Western Kenya
Source: BMC Cancer. 2023 Jun 20;23:566. doi: 10.1186/s12885-023-11063-2 (PMC10280846; doi:10.1186/s12885-023-11063-2)
Supplement: Supplementary file 1 — Supplementary Material 1 [file 12885_2023_11063_MOESM1_ESM.xlsx]

## Sheet: EBV-Hemoglobinopathies data
SUPPLEMENTARY FILE I. This is the raw data for the study.
SampleID	GenderMF1/2	Infantage@Visit6weeks	InfantEBV.status@6weeks	InfantMalaria_results@6weeks	Infantage_Visit10wks	InfantEBV.status_Visit10wks	InfantMalaria_results_Visit10wks	Infantage@14wks	InfantEBV.status@14wks	InfantMalaria_results@14wks	Infantage@18wks	InfantEBV.status@18wks	InfantMalaria_results@18wks	Infantage@6mos	InfantEBV.status@6mos	InfantMalaria_results@6mos	Infantage@9mos	InfantEBV.status@9mos	InfantMalaria_results@9mos	Infantage@12mos	InfantEBV.status@12mos	InfantMalaria_results@12mos	infantmalaria exposureby12months	InfantEBVstatus<6 months of ages	InfantEBVstatusand ≥6-12 months of ages	αThalassemiagenotype	αThalassemiagenotypecode	Sicklecellgenotype	HbAScode	G6PDGROUPA1MahidolCoimbr487GgtA592CgtT	G6PDGROUPA1MahidolCoimbr487GgtA592CgtT_A	G6PDGROUPA2ViangchanChinese871GgtT1024CgtT	G6PDGROUPA2ViangchanChinese871GgtT1024CgtT_A	G6PDGROUPBUnionKaiping1360CgtT1388GgtA	G6PDGROUPBUnionKaiping1360CgtT1388GgtA_A	G6PDAfricanvariant	G6PDAfricanvariantCODE	AfricanG6PDvariant	G6PDAfricanAcombinedcode2
1	1	6 Weeks	0	0	10 Weeks	0	0	14 Weeks	0	0	18 Weeks	0	0	6 Months	0	0	9 Months	0	1	12 months	0	0	0	0	0	normal	0	heterozygous	1	Positive	1	Positive	1	Positive	1	A	1	A	1
2	2	6 Weeks	0	0	10 Weeks	0	0	14 Weeks	0	0	18 Weeks	0	0	6 Months	0	0	9 Months	0	0	12 months	0	0	0	0	0	normal	0	heterozygous	1	Positive	1	Positive	1	Positive	1	A	1	A	1
3	2	6 Weeks	1	0	10 Weeks	0	0	14 Weeks	0	0	18 Weeks	0	0	6 Months	0	0	9 Months	0	0	12 months	0	0	0	1	1	normal	0	heterozygous	1	Positive	1	Positive	1	Positive	1	A	1	A	1
4	2	6 Weeks	1	0	10 Weeks	1	0	14 Weeks	0	0	18 Weeks	N/A	N/A	6 Months	0	0	9 Months	0	0	12 months	0	0	0	1	0	normal	0	heterozygous	1	Positive	1	Positive	1	Negative	0	A	1	A	1
5	1	6 Weeks	1	0	10 Weeks	0	1	14 Weeks	1	0	18 Weeks	N/A	N/A	6 Months	0	0	9 Months	0	0	12 months	1	0	0	1	0	normal	0	heterozygous	1	Negative	0	Negative	0	Negative	0	A	1	A	1
6	1	6 Weeks	1	0	10 Weeks	0	0	14 Weeks	0	0	18 Weeks	0	0	6 Months	0	1	9 Months	0	1	12 months	0	1	1	1	1	normal	0	heterozygous	1	Positive	1	Positive	1	Negative	0	A	1	A	1
7	2	6 Weeks	1	0	10 Weeks	0	0	14 Weeks	0	0	18 Weeks	0	0	6 Months	0	0	9 Months	0	0	12 months	1	0	0	1	1	normal	0	heterozygous	1	Positive	1	Positive	1	Positive	1	A-	2	A-	2
8	2	6 Weeks	1	0	10 Weeks	0	0	14 Weeks	0	0	18 Weeks	0	0	6 Months	0	0	9 Months	0	0	12 months	N/A	N/A	0	1	0	normal	0	heterozygous	1	Positive	1	Positive	1	Positive	1	A-	2	A-	2
9	2	6 Weeks	N/A	N/A	10 Weeks	0	0	14 Weeks	0	0	18 Weeks	0	0	6 Months	0	0	9 Months	N/A	N/A	12 months	N/A	N/A	0	0	0	normal	0	heterozygous	1	Positive	1	Positive	1	Positive	1	A-	2	A-	2
10	1	6 Weeks	0	0	10 Weeks	1	0	14 Weeks	0	0	18 Weeks	0	0	6 Months	0	1	9 Months	0	0	12 months	0	0	1	1	1	normal	0	normal	0	Positive	1	Positive	1	Positive	1	A	1	A	1
11	1	6 Weeks	1	0	10 Weeks	1	0	14 Weeks	0	0	18 Weeks	0	0	6 Months	0	0	9 Months	0	0	12 months	0	0	0	1	0	normal	0	normal	0	Positive	1	Positive	1	Positive	1	A	1	A	1
12	1	6 Weeks	1	0	10 Weeks	0	0	14 Weeks	0	0	18 Weeks	0	0	6 Months	0	0	9 Months	0	0	12 months	0	0	0	1	1	normal	0	normal	0	Positive	1	Positive	1	Positive	1	A	1	A	1
13	1	6 Weeks	1	0	10 Weeks	0	0	14 Weeks	0	0	18 Weeks	0	0	6 Months	0	0	9 Months	0	0	12 months	0	0	0	1	0	normal	0	normal	0	Positive	1	Positive	1	Positive	1	A	1	A	1
14	1	6 Weeks	1	0	10 Weeks	0	0	14 Weeks	0	0	18 Weeks	0	0	6 Months	0	0	9 Months	0	0	12 months	0	0	0	1	0	normal	0	normal	0	Positive	1	Positive	1	Positive	1	A	1	A	1
15	2	6 Weeks	1	0	10 Weeks	1	0	14 Weeks	0	0	18 Weeks	1	0	6 Months	0	0	9 Months	0	0	12 months	0	0	0	1	1	normal	0	normal	0	Positive	1	Negative	0	Positive	1	A	1	A	1
16	2	6 Weeks	1	0	10 Weeks	0	0	14 Weeks	0	0	18 Weeks	0	0	6 Months	0	0	9 Months	0	0	12 months	0	0	0	1	0	normal	0	normal	0	Positive	1	Positive	1	Positive	1	A	1	A	1
17	2	6 Weeks	1	0	10 Weeks	0	0	14 Weeks	0	0	18 Weeks	1	0	6 Months	0	0	9 Months	0	0	12 months	0	0	0	1	1	normal	0	normal	0	Positive	1	Positive	1	Positive	1	A	1	A	1
18	1	6 Weeks	N/A	N/A	10 Weeks	0	0	14 Weeks	0	0	18 Weeks	0	0	6 Months	0	0	9 Months	0	0	12 months	0	0	0	0	1	normal	0	normal	0	Positive	1	Positive	1	Negative	0	A	1	A	1
19	2	6 Weeks	0	0	10 Weeks	0	0	14 Weeks	1	0	18 Weeks	0	0	6 Months	0	0	9 Months	0	0	12 months	0	0	0	1	1	normal	0	normal	0	Negative	0	Positive	1	Positive	1	A	1	A	1
20	2	6 Weeks	0	0	10 Weeks	0	0	14 Weeks	N/A	N/A	18 Weeks	0	0	6 Months	0	0	9 Months	0	1	12 months	0	0	1	0	1	normal	0	normal	0	Positive	1	Positive	1	Positive	1	A	1	A	1
21	2	6 Weeks	1	0	10 Weeks	1	0	14 Weeks	0	0	18 Weeks	0	1	6 Months	0	0	9 Months	0	1	12 months	0	0	1	1	0	normal	0	normal	0	Positive	1	Negative	0	Positive	1	A	1	A	1
22	1	6 Weeks	1	0	10 Weeks	1	0	14 Weeks	1	0	18 Weeks	N/A	N/A	6 Months	0	0	9 Months	0	1	12 months	0	0	1	1	1	normal	0	normal	0	Positive	1	Positive	1	Positive	1	A	1	A	1
23	1	6 Weeks	1	0	10 Weeks	1	0	14 Weeks	0	0	18 Weeks	0	0	6 Months	0	0	9 Months	0	0	12 months	1	0	0	1	1	normal	0	normal	0	Negative	0	Positive	1	Positive	1	A	1	A	1
24	1	6 Weeks	1	0	10 Weeks	1	0	14 Weeks	N/A	N/A	18 Weeks	N/A	N/A	6 Months	0	0	9 Months	0	0	12 months	1	0	0	1	0	normal	0	normal	0	Negative	0	Positive	1	Positive	1	A	1	A	1
25	2	6 Weeks	1	0	10 Weeks	1	0	14 Weeks	N/A	N/A	18 Weeks	0	1	6 Months	0	0	9 Months	1	0	12 months	1	0	1	1	0	normal	0	normal	0	Positive	1	Positive	1	Positive	1	A	1	A	1
26	2	6 Weeks	1	0	10 Weeks	1	0	14 Weeks	1	0	18 Weeks	N/A	N/A	6 Months	0	0	9 Months	N/A	N/A	12 months	1	0	0	1	1	normal	0	normal	0	Positive	1	Positive	1	Positive	1	A	1	A	1
27	1	6 Weeks	1	0	10 Weeks	0	0	14 Weeks	1	0	18 Weeks	0	0	6 Months	0	0	9 Months	0	1	12 months	0	1	1	1	0	normal	0	normal	0	Positive	1	Positive	1	Positive	1	A	1	A	1
28	1	6 Weeks	1	0	10 Weeks	1	0	14 Weeks	0	0	18 Weeks	N/A	N/A	6 Months	0	1	9 Months	0	1	12 months	0	1	1	1	1	normal	0	normal	0	Positive	1	Negative	0	Positive	1	A	1	A	1
29	2	6 Weeks	1	0	10 Weeks	1	0	14 Weeks	0	1	18 Weeks	0	0	6 Months	0	0	9 Months	1	0	12 months	1	1	1	1	0	normal	0	normal	0	Positive	1	Positive	1	Positive	1	A	1	A	1
30	1	6 Weeks	1	0	10 Weeks	0	0	14 Weeks	0	0	18 Weeks	0	0	6 Months	0	0	9 Months	0	0	12 months	N/A	N/A	0	1	0	normal	0	normal	0	Positive	1	Positive	1	Positive	1	A	1	A	1
31	1	6 Weeks	1	0	10 Weeks	0	0	14 Weeks	0	0	18 Weeks	0	0	6 Months	0	0	9 Months	1	0	12 months	N/A	N/A	0	1	0	normal	0	normal	0	Positive	1	Positive	1	Positive	1	A	1	A	1
32	2	6 Weeks	1	0	10 Weeks	0	0	14 Weeks	N/A	N/A	18 Weeks	0	0	6 Months	N/A	N/A	9 Months	N/A	N/A	12 months	N/A	N/A	0	1	1	normal	0	normal	0	Positive	1	Positive	1	Positive	1	A	1	A	1
33	2	6 Weeks	0	0	10 Weeks	0	0	14 Weeks	0	0	18 Weeks	N/A	N/A	6 Months	N/A	N/A	9 Months	N/A	N/A	12 months	N/A	N/A	0	0	0	normal	0	normal	0	Positive	1	Positive	1	Positive	1	A	1	A	1
34	1	6 Weeks	0	0	10 Weeks	0	0	14 Weeks	0	0	18 Weeks	0	0	6 Months	0	0	9 Months	0	0	12 months	0	N/A	0	0	0	normal	0	normal	0	Positive	1	Positive	1	Positive	1	A	1	A	1
35	2	6 Weeks	0	0	10 Weeks	1	0	14 Weeks	0	0	18 Weeks	0	0	6 Months	0	1	9 Months	0	0	12 months	0	0	1	1	0	normal	0	normal	0	Positive	1	Positive	1	Positive	1	A-	2	A-	2
36	2	6 Weeks	1	0	10 Weeks	0	0	14 Weeks	0	0	18 Weeks	0	0	6 Months	0	0	9 Months	0	0	12 months	0	0	0	1	0	normal	0	normal	0	Positive	1	Positive	1	Positive	1	A-	2	A-	2
37	2	6 Weeks	1	0	10 Weeks	0	0	14 Weeks	0	0	18 Weeks	0	0	6 Months	0	0	9 Months	0	0	12 months	0	0	0	1	0	normal	0	normal	0	Positive	1	Positive	1	Positive	1	A-	2	A-	2
38	1	6 Weeks	0	0	10 Weeks	0	0	14 Weeks	0	0	18 Weeks	N/A	N/A	6 Months	1	0	9 Months	0	0	12 months	0	0	0	0	1	normal	0	normal	0	Negative	0	Positive	1	Positive	1	A-	2	A-	2
39	1	6 Weeks	1	0	10 Weeks	1	0	14 Weeks	0	0	18 Weeks	N/A	N/A	6 Months	N/A	N/A	9 Months	0	0	12 months	0	0	0	1	0	normal	0	normal	0	Positive	1	Positive	1	Positive	1	A-	2	A-	2
40	2	6 Weeks	1	0	10 Weeks	1	0	14 Weeks	0	0	18 Weeks	0	0	6 Months	0	0	9 Months	0	0	12 months	1	0	0	1	0	normal	0	normal	0	Positive	1	Positive	1	Negative	0	A-	2	A-	2
41	2	6 Weeks	0	0	10 Weeks	0	0	14 Weeks	0	0	18 Weeks	0	0	6 Months	0	0	9 Months	1	0	12 months	1	0	0	0	1	normal	0	normal	0	Positive	1	Positive	1	Positive	1	A-	2	A-	2
42	1	6 Weeks	1	0	10 Weeks	0	0	14 Weeks	0	0	18 Weeks	0	0	6 Months	0	0	9 Months	0	0	12 months	N/A	N/A	0	1	0	normal	0	normal	0	Positive	1	Positive	1	Negative	0	A-	2	A-	2
43	2	6 Weeks	0	0	10 Weeks	1	0	14 Weeks	0	1	18 Weeks	0	0	6 Months	N/A	N/A	9 Months	N/A	N/A	12 months	N/A	N/A	1	1	1	normal	0	normal	0	Positive	1	Positive	1	Positive	1	A-	2	A-	2
44	1	6 Weeks	N/A	N/A	10 Weeks	1	0	14 Weeks	0	0	18 Weeks	0	0	6 Months	0	0	9 Months	0	0	12 months	0	0	0	1	0	normal	0	normal	0	Positive	1	Positive	1	Positive	1	Wild Type	0	Wild Type	1
45	1	6 Weeks	1	0	10 Weeks	0	0	14 Weeks	0	0	18 Weeks	0	0	6 Months	0	0	9 Months	1	0	12 months	1	0	0	1	1	normal	0	normal	0	Negative	0	Positive	1	Negative	0	Wild Type	0	Wild Type	1
46	1	6 Weeks	1	0	10 Weeks	1	0	14 Weeks	0	0	18 Weeks	0	0	6 Months	0	0	9 Months	1	0	12 months	1	0	0	1	0	normal	0	normal	0	Positive	1	Positive	1	Positive	1	Wild Type	0	Wild Type	1
47	2	6 Weeks	1	0	10 Weeks	0	0	14 Weeks	0	0	18 Weeks	0	0	6 Months	0	0	9 Months	0	0	12 months	N/A	N/A	0	1	0	heterozygous	1	undetermined	undetermined	Positive	1	Positive	1	Positive	1	A	1	A	1
48	1	6 Weeks	N/A	N/A	10 Weeks	1	0	14 Weeks	1	0	18 Weeks	0	0	6 Months	0	0	9 Months	0	0	12 months	0	0	0	1	0	heterozygous	1	heterozygous	1	Positive	1	Positive	1	Positive	1	A	1	A	1
49	2	6 Weeks	1	0	10 Weeks	1	0	14 Weeks	0	0	18 Weeks	0	0	6 Months	0	0	9 Months	1	0	12 months	1	0	0	1	1	heterozygous	1	heterozygous	1	Positive	1	Positive	1	Positive	1	A	1	A	1
50	1	6 Weeks	1	0	10 Weeks	1	0	14 Weeks	1	0	18 Weeks	1	0	6 Months	1	0	9 Months	1	0	12 months	1	0	0	1	0	heterozygous	1	heterozygous	1	Positive	1	Positive	1	Negative	0	A	1	A	1
51	2	6 Weeks	1	1	10 Weeks	0	0	14 Weeks	0	0	18 Weeks	0	0	6 Months	0	0	9 Months	0	0	12 months	N/A	N/A	1	1	0	heterozygous	1	heterozygous	1	Positive	1	Positive	1	Positive	1	A	1	A	1
52	2	6 Weeks	1	0	10 Weeks	0	0	14 Weeks	0	0	18 Weeks	0	0	6 Months	N/A	N/A	9 Months	N/A	N/A	12 months	N/A	N/A	0	1	0	heterozygous	1	heterozygous	1	Positive	1	Positive	1	Positive	1	A	1	A	1
53	2	6 Weeks	1	0	10 Weeks	0	0	14 Weeks	0	0	18 Weeks	1	0	6 Months	0	0	9 Months	0	0	12 months	0	0	0	1	0	heterozygous	1	heterozygous	1	Positive	1	Positive	1	Positive	1	A-	2	A-	2
54	1	6 Weeks	1	0	10 Weeks	0	0	14 Weeks	0	0	18 Weeks	0	0	6 Months	1	0	9 Months	1	0	12 months	1	0	0	1	0	heterozygous	1	heterozygous	1	Positive	1	Positive	1	Negative	0	Wild Type	0	Wild Type	1
55	1	6 Weeks	1	0	10 Weeks	1	0	14 Weeks	0	0	18 Weeks	0	0	6 Months	1	0	9 Months	1	1	12 months	1	0	1	1	1	heterozygous	1	normal	0	Positive	1	Positive	1	Negative	0	A	1	A	1
56	1	6 Weeks	1	0	10 Weeks	0	0	14 Weeks	0	0	18 Weeks	0	0	6 Months	0	0	9 Months	0	0	12 months	0	0	0	1	0	heterozygous	1	normal	0	Positive	1	Positive	1	Positive	1	A	1	A	1
57	1	6 Weeks	0	0	10 Weeks	1	0	14 Weeks	0	0	18 Weeks	0	0	6 Months	1	0	9 Months	0	0	12 months	0	0	0	1	1	heterozygous	1	normal	0	Positive	1	Positive	1	Positive	1	A	1	A	1
58	1	6 Weeks	1	0	10 Weeks	0	0	14 Weeks	N/A	N/A	18 Weeks	N/A	N/A	6 Months	N/A	N/A	9 Months	0	0	12 months	0	0	0	1	0	heterozygous	1	normal	0	Positive	1	Positive	1	Positive	1	A	1	A	1
59	1	6 Weeks	1	0	10 Weeks	1	0	14 Weeks	0	0	18 Weeks	0	0	6 Months	1	0	9 Months	1	0	12 months	0	0	0	1	0	heterozygous	1	normal	0	Positive	1	Positive	1	Negative	0	A	1	A	1
60	1	6 Weeks	1	0	10 Weeks	1	0	14 Weeks	0	0	18 Weeks	0	0	6 Months	1	0	9 Months	1	0	12 months	0	0	0	1	0	heterozygous	1	normal	0	Positive	1	Positive	1	Positive	1	A	1	A	1
61	2	6 Weeks	1	0	10 Weeks	0	1	14 Weeks	0	0	18 Weeks	0	1	6 Months	N/A	N/A	9 Months	0	0	12 months	1	0	1	1	0	heterozygous	1	normal	0	Positive	1	Positive	1	Positive	1	A	1	A	1
62	2	6 Weeks	0	0	10 Weeks	1	0	14 Weeks	N/A	N/A	18 Weeks	N/A	N/A	6 Months	0	0	9 Months	0	0	12 months	0	1	1	1	1	heterozygous	1	normal	0	Positive	1	Positive	1	Positive	1	A	1	A	1
63	2	6 Weeks	1	0	10 Weeks	0	0	14 Weeks	0	0	18 Weeks	N/A	N/A	6 Months	0	0	9 Months	1	0	12 months	0	1	1	1	0	heterozygous	1	normal	0	Positive	1	Positive	1	Positive	1	A	1	A	1
64	2	6 Weeks	1	0	10 Weeks	1	0	14 Weeks	0	0	18 Weeks	0	0	6 Months	0	0	9 Months	0	0	12 months	1	1	1	1	1	heterozygous	1	normal	0	Positive	1	Positive	1	Positive	1	A	1	A	1
65	1	6 Weeks	N/A	N/A	10 Weeks	1	1	14 Weeks	0	0	18 Weeks	0	0	6 Months	0	0	9 Months	1	0	12 months	1	1	1	1	1	heterozygous	1	normal	0	Positive	1	Positive	1	Positive	1	A	1	A	1
66	2	6 Weeks	0	0	10 Weeks	0	0	14 Weeks	0	0	18 Weeks	0	0	6 Months	0	0	9 Months	0	0	12 months	N/A	N/A	0	0	1	heterozygous	1	normal	0	Positive	1	Positive	1	Positive	1	A	1	A	1
67	1	6 Weeks	1	0	10 Weeks	0	0	14 Weeks	0	0	18 Weeks	0	0	6 Months	0	0	9 Months	N/A	N/A	12 months	N/A	N/A	0	1	1	heterozygous	1	normal	0	Positive	1	Positive	1	Positive	1	A	1	A	1
68	2	6 Weeks	1	0	10 Weeks	0	0	14 Weeks	0	0	18 Weeks	0	1	6 Months	0	0	9 Months	N/A	N/A	12 months	N/A	N/A	1	1	0	heterozygous	1	normal	0	Positive	1	Positive	1	Positive	1	A	1	A	1
69	2	6 Weeks	1	0	10 Weeks	0	0	14 Weeks	0	0	18 Weeks	1	0	6 Months	1	0	9 Months	N/A	N/A	12 months	N/A	N/A	0	1	1	heterozygous	1	normal	0	Positive	1	Positive	1	Positive	1	A	1	A	1
70	2	6 Weeks	1	0	10 Weeks	0	0	14 Weeks	0	0	18 Weeks	0	0	6 Months	N/A	N/A	9 Months	N/A	N/A	12 months	N/A	N/A	0	1	1	heterozygous	1	normal	0	Positive	1	Positive	1	Positive	1	A	1	A	1
71	1	6 Weeks	0	0	10 Weeks	0	0	14 Weeks	0	0	18 Weeks	0	0	6 Months	0	0	9 Months	0	0	12 months	0	0	0	0	0	heterozygous	1	normal	0	Negative	0	Positive	1	Positive	1	A-	2	A-	2
72	1	6 Weeks	0	1	10 Weeks	0	0	14 Weeks	0	0	18 Weeks	0	0	6 Months	0	0	9 Months	0	0	12 months	0	0	1	0	0	heterozygous	1	normal	0	Negative	0	Positive	1	Positive	1	A-	2	A-	2
73	2	6 Weeks	1	0	10 Weeks	0	0	14 Weeks	0	0	18 Weeks	0	0	6 Months	0	1	9 Months	0	1	12 months	0	0	1	1	0	heterozygous	1	normal	0	Positive	1	Positive	1	Positive	1	A-	2	A-	2
74	2	6 Weeks	1	0	10 Weeks	0	0	14 Weeks	0	0	18 Weeks	N/A	N/A	6 Months	N/A	N/A	9 Months	1	0	12 months	1	0	0	1	0	heterozygous	1	normal	0	Positive	1	Positive	1	Positive	1	A-	2	A-	2
75	1	6 Weeks	1	0	10 Weeks	1	0	14 Weeks	0	0	18 Weeks	N/A	N/A	6 Months	0	0	9 Months	0	0	12 months	N/A	N/A	0	1	1	heterozygous	1	normal	0	Positive	1	Positive	1	Negative	0	A-	2	A-	2
76	1	6 Weeks	N/A	N/A	10 Weeks	0	0	14 Weeks	N/A	N/A	18 Weeks	N/A	N/A	6 Months	0	0	9 Months	0	0	12 months	N/A	N/A	0	0	0	heterozygous	1	normal	0	Positive	1	Positive	1	Positive	1	A-	2	A-	2
77	1	6 Weeks	1	0	10 Weeks	0	0	14 Weeks	0	0	18 Weeks	0	0	6 Months	1	0	9 Months	0	0	12 months	N/A	N/A	0	1	0	heterozygous	1	normal	0	Positive	1	Negative	0	Positive	1	Undetermined	N/A	N/A	N/A
78	2	6 Weeks	N/A	N/A	10 Weeks	1	0	14 Weeks	0	0	18 Weeks	0	0	6 Months	1	0	9 Months	0	0	12 months	0	0	0	1	0	heterozygous	1	normal	0	Positive	1	Positive	1	Negative	0	Wild Type	0	Wild Type	1
79	1	6 Weeks	1	0	10 Weeks	1	0	14 Weeks	0	0	18 Weeks	0	0	6 Months	0	1	9 Months	0	0	12 months	0	1	0	1	0	heterozygous	1	normal	0	Negative	0	Positive	1	Positive	1	Wild Type	0	Wild Type	1
80	2	6 Weeks	1	0	10 Weeks	1	0	14 Weeks	0	0	18 Weeks	0	0	6 Months	0	0	9 Months	1	0	12 months	1	0	0	1	0	heterozygous	1	undetermined	undetermined	Positive	1	Positive	1	Negative	0	A	1	A	1
81	1	6 Weeks	1	0	10 Weeks	0	0	14 Weeks	1	0	18 Weeks	0	0	6 Months	0	0	9 Months	0	0	12 months	1	0	0	1	0	Homozygous	2	heterozygous	1	Positive	1	Positive	1	Negative	0	A	1	A	1
